# Supplementary material for: State-dependent mortality can enhance behavioral unpredictability
Source: BMC Ecol. 2020 Jun 25;20:34. doi: 10.1186/s12898-020-00303-9 (PMC7315534; doi:10.1186/s12898-020-00303-9)
Supplement: Supplementary file 1 — Additional file 1. R script to produce Fig. 1. [file 12898_2020_303_MOESM1_ESM.r]

# figure 1
nind <- 1000                       # number of simulations
lambda <- 1/100                    # lambda
a <- 100                           # a
b <- 25                            # b 
opt.t <- sqrt(lambda*b)/lambda     # optimal t (t*)
max.time <- c(100000,300)          # total foraging duration
sigma.t <- 0:3                     # sigma[t] = behavioral unpredictability
sigma.s  <- sqrt(5)                # sigma[s]
g <- function(x,a,b) x*a/(b+x)     # g(t)

#set.seed(101)
res <- NULL

for(l in 1:length(max.time)){
for(k in 1:length(sigma.s)){
for(j in 1:length(sigma.t)){
for(i in 1:nind){
   rem.time <- max.time[l]
   energy <- 0
   s.time <- ifelse(sigma.s[k]==0,(1/lambda),rgamma(1,shape=(1/lambda)^2/sigma.s[k]^2,scale=sigma.s[k]^2/(1/lambda)))
   while(s.time < rem.time){
    rem.time <- rem.time - s.time 
    r.time <- ifelse(sigma.t[j]==0,opt.t,rgamma(1,shape=opt.t^2/sigma.t[j]^2,scale=sigma.t[j]^2/opt.t))
    energy <- energy + g(min(r.time,rem.time),a,b)
    rem.time <- max(0,rem.time-r.time)
    s.time <- ifelse(sigma.s[k]==0,(1/lambda),rgamma(1,shape=(1/lambda)^2/sigma.s[k]^2,scale=sigma.s[k]^2/(1/lambda)))
   }
   res <- rbind(res,c(energy,sigma.t[j],sigma.s[k],max.time[l]))
}}}}
colnames(res) <- c("y","sigma.t","sigma.s","time")
res <- as.data.frame(res)

par(mfrow=c(1,2),cex.lab=1,cex.axis=1,mai=c(0.7,0.7,0.5,0.1))
par(mgp=c(2.2,1,0))
boxplot(y~sigma.t,data=res[res$time==max.time[1],],xlab="behavioral unpredictability",ylab="foraging success")
mtext("total foraging duration = 100000",line=0.5)
boxplot(y~sigma.t,data=res[res$time==max.time[2],],xlab="behavioral unpredictability",ylab="foraging success")
mtext("total foraging duration = 300",line=0.5)
